# Supplementary material for: Prognostic value of retinal neurodegeneration markers for the progression of diabetic retinopathy: a systematic review and meta-analysis
Source: Research Square preprint supplement (doi:10.21203/rs.3.rs-8149687/v1), 2025-12-01
Supplement: Supplementary file [file 3392eed002328297f3982c84.pdf]

**Question:** High flow deficit in the choriocapillaris (CC FD%) versus low flow deficit in the choriocapillaris (CC FD%) for Progression of Diabetic Retinopathy in Patients with Type 2 Diabetes.

| Certainty assessment |              |              |               |              |             |                      | № of patients                                      |                                                                | Effect            |                   | Certainty | Importance |
|----------------------|--------------|--------------|---------------|--------------|-------------|----------------------|----------------------------------------------------|----------------------------------------------------------------|-------------------|-------------------|-----------|------------|
| № of studies         | Study design | Risk of bias | Inconsistency | Indirectness | Imprecision | Other considerations | High flow deficit in the choriocapillaris (CC FD%) | [comparison] Low flow deficit in the choriocapillaris (CC FD%) | Relative (95% CI) | Absolute (95% CI) |           |            |

Progression of Diabetic Retinopathy (CC FD%)

|   |                        |                      |                           |             |                           |      |  |                  |                        |                                               |                                                                                                               |          |
|---|------------------------|----------------------|---------------------------|-------------|---------------------------|------|--|------------------|------------------------|-----------------------------------------------|---------------------------------------------------------------------------------------------------------------|----------|
| 2 | non-randomised studies | serious <sup>a</sup> | very serious <sup>b</sup> | not serious | very serious <sup>c</sup> | none |  | 304/1849 (16.4%) | RR 2.33 (1.13 to 4.84) | 219 more per 1.000 (from 21 more to 631 more) |  Very low <sup>a,b,c</sup> | CRITICAL |
|---|------------------------|----------------------|---------------------------|-------------|---------------------------|------|--|------------------|------------------------|-----------------------------------------------|---------------------------------------------------------------------------------------------------------------|----------|

CI: confidence interval; RR: risk ratio

Explanations

- a. Certainty was downgraded by one level due to serious risk of bias. The body of evidence consists of only two studies, one classified as high risk (28) and the other as moderate risk (34).
- b. Certainty was downgraded two levels for Very Serious Inconsistency. The meta-analysis revealed extremely high statistical heterogeneity ( $I^2 = 96.0\%$ ), driven by very different effect sizes between the two studies (RR 3.41 vs. RR 1.62).
- c. Certainty has been downgraded by one level for Serious Imprecision. The 95% confidence interval of the pooled result (RR 2.33) is very wide (1.13 to 4.84), and its lower bound (1.13) is very close to the no-effect line (1.0), indicating substantial uncertainty.

**Question:** m-GCIPL damage versus no m-GCIPL damage for Progression of Diabetic Retinopathy in Patients with Type 2 Diabetes.

| Certainty assessment |              |              |               |              |             |                      | № of patients                  |                                 | Effect            |                   | Certainty | Importance |
|----------------------|--------------|--------------|---------------|--------------|-------------|----------------------|--------------------------------|---------------------------------|-------------------|-------------------|-----------|------------|
| № of studies         | Study design | Risk of bias | Inconsistency | Indirectness | Imprecision | Other considerations | (Intervention): m-GCIPL damage | (Comparison): No m-GCIPL damage | Relative (95% CI) | Absolute (95% CI) |           |            |

**m-GCIPL**

|   |                        |                      |             |                      |             |      |  |                 |                        |                                               |                                                                                                             |          |
|---|------------------------|----------------------|-------------|----------------------|-------------|------|--|-----------------|------------------------|-----------------------------------------------|-------------------------------------------------------------------------------------------------------------|----------|
| 2 | non-randomised studies | serious <sup>a</sup> | not serious | serious <sup>b</sup> | not serious | none |  | 138/472 (29.2%) | HR 1.55 (1.28 to 1.87) | 123 more per 1.000 (from 65 more to 184 more) |  Very low <sup>a,b</sup> | CRITICAL |
|---|------------------------|----------------------|-------------|----------------------|-------------|------|--|-----------------|------------------------|-----------------------------------------------|-------------------------------------------------------------------------------------------------------------|----------|

**CI:** confidence interval; **HR:** hazard ratio

**Explanations**

- a. Certainty was downgraded by one level for serious Risk of Bias. The body of evidence consists of two studies, one classified as low risk (32) and the other as moderate risk (37).
- b. Certainty was downgraded one level to Indirect Evidence. The two studies were combined, but measured the biomarker by methodologically different methods (one measured the rate of thinning (32), the other the thickness at baseline (37)).
